# Supplementary material
Source: Springer Nature journal article supplement (https://www.springermedizin.de/resource/supplementary/12935_2006_147_MOESM5_ESM.pdf/9541184)

# MEF - 12(1)

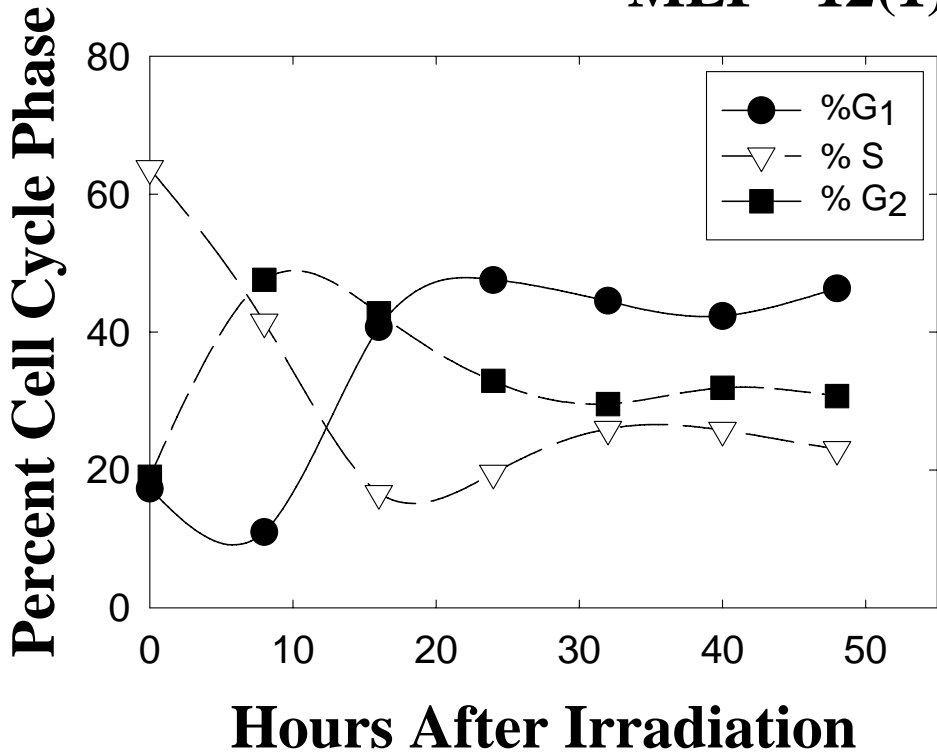

Supplement: MOESM5 [file 9541184]
